# Supplementary material for: A novel method for screening deep eutectic solvent to recycle the cathode of Li-ion batteries
Source: Royal Society of Chemistry journal article supplement (doi:10.1039/d0gc00701c), 2020-01-01
Supplement: d0gc00701c1.pdf [file d0gc00701c1.pdf]

## Supplementary Information

### A novel method for screening deep eutectic solvent to recycle cathode of Li-ion batteries

Shubin Wang,<sup>a</sup> Zuotai Zhang,<sup>a\*</sup> Zhouguang Lu<sup>b</sup> and Zhenghe Xu<sup>b</sup>

<sup>a</sup> School of Environmental Science and Engineering, Southern University of Science and Technology (SUSTech), Shenzhen 518055, China.

<sup>b</sup> Department of Materials Science and Engineering, Southern University of Science and Technology (SUSTech), Shenzhen 518055, China.

#### \*Corresponding author:

E-mail address: zhangzt@sustech.edu.cn (Z. Zhang)

#### Deep Eutectic Solvent Recyclability and Selectivity

The electrodeposition technique is a common method to recycle metals from the loaded DES apart from chemical precipitation. The three-electrode system (in section: **Analysis of DES and leachate**) at cathodic potential of -0.9 V and at 100°C for 10 hours was employed to recycle metal from the DES sample that digested LiCoO<sub>2</sub> (LCO) at 140°C. The loaded DES after electrodeposition became from blue to yellow (**Fig. S8b** and **S8c**). The similar yellow ChCl : urea DES was obtained from colorless ChCl : urea DES after cyclic voltammetry.<sup>1</sup> The yellow ChCl : urea DES was extracted metals from LCO powder and its color became bluish-green containing cobalt of 0.459 g L<sup>-1</sup> as similar as original DES at 140°C (**Fig. S8d**). That indicated DES can be renewable in the process of LIBs recycle.<sup>2</sup>

Dismantled cathode materials of spent LIBs (LCO) were sieved by a 100 mesh sieve (LCO-1) and 120 mesh sieve (LCO-2). The extraction results were shown as **Fig. S9**. The extraction efficiency of Li and Co from spent LCO was close to that from LCO powder. The extraction of Al was weak by using ChCl : urea DES from spent LCO. That indicates that the DES could also be used to recycle spent LIBS.

Three kinds of LiNi<sub>x</sub>Co<sub>y</sub>Mn<sub>z</sub>O<sub>2</sub> (NCM) powder were employed, where ratios of x:y:z were 811, 532 and 111. The extraction results were shown as **Fig. S10**. The extraction efficiency of Li, Ni, Co and Mn from NCM powder was about 90%. That indicated ChCl : urea DES could also be used to recycle NCM powder.

# Figures and Tables:

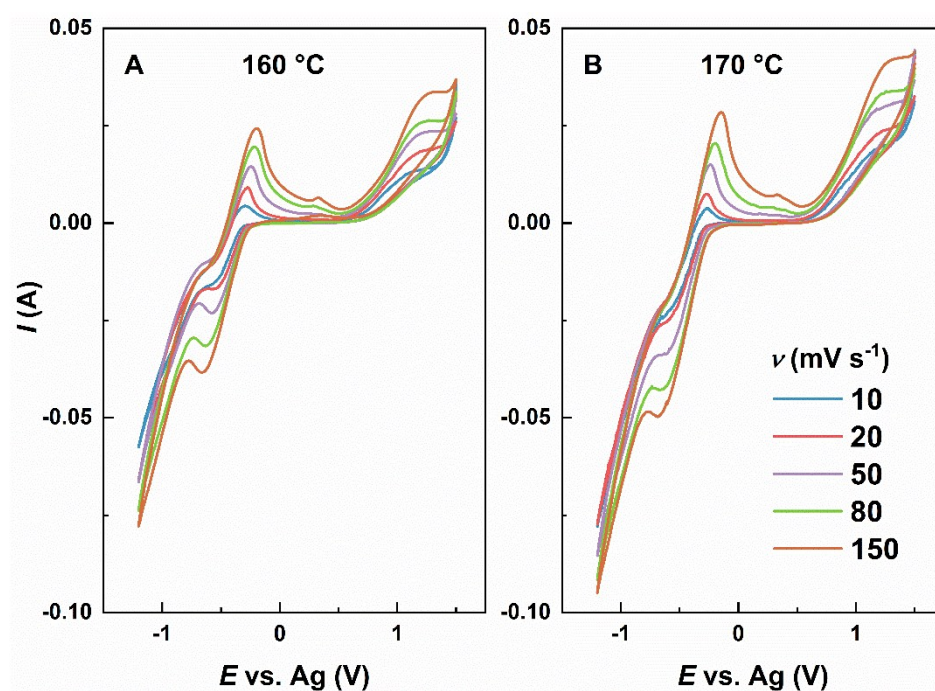

**Fig. S1** Cyclic voltammetry behavior of ChCl : urea DESs at various scan rates and 160 °C and 170 °C.

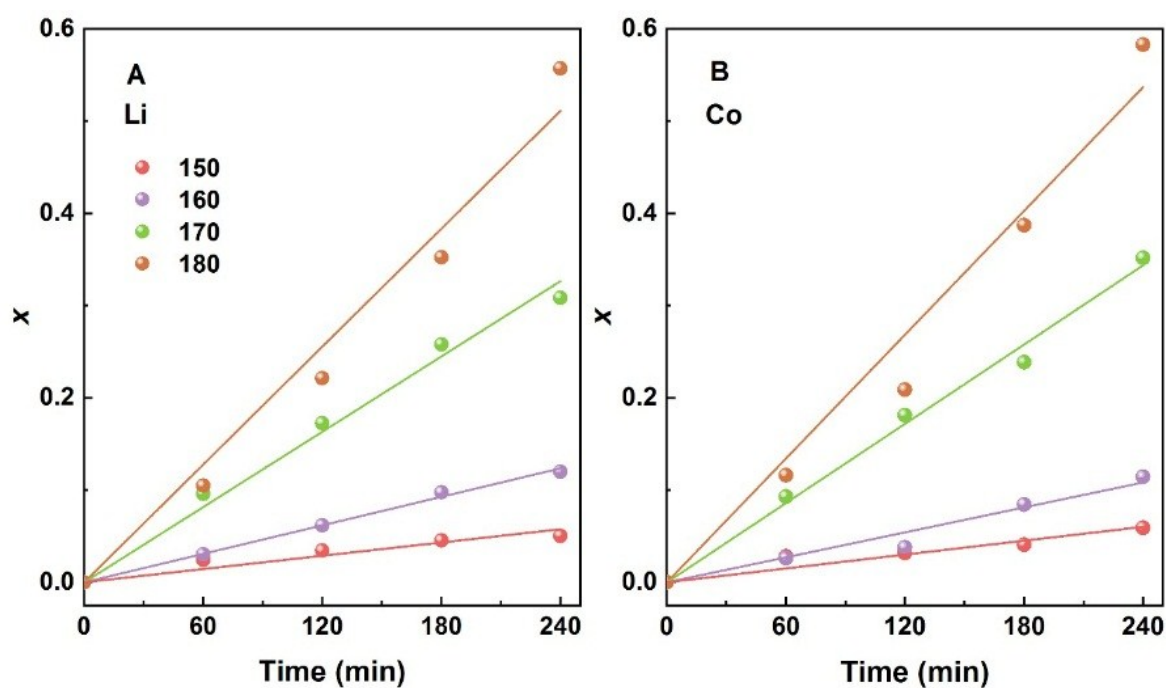

**Fig. S2** Solution diffusion control model for kinetics of Li (A) and Co (B) extraction.

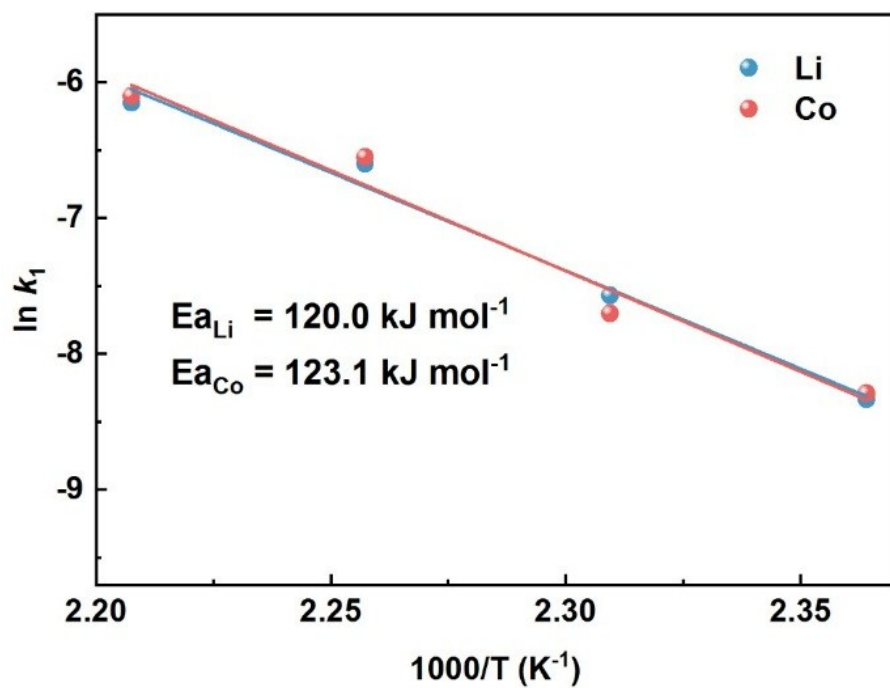

**Fig. S3** Arrhenius plot for Li and Co extraction in series of temperatures (423 – 453 K).

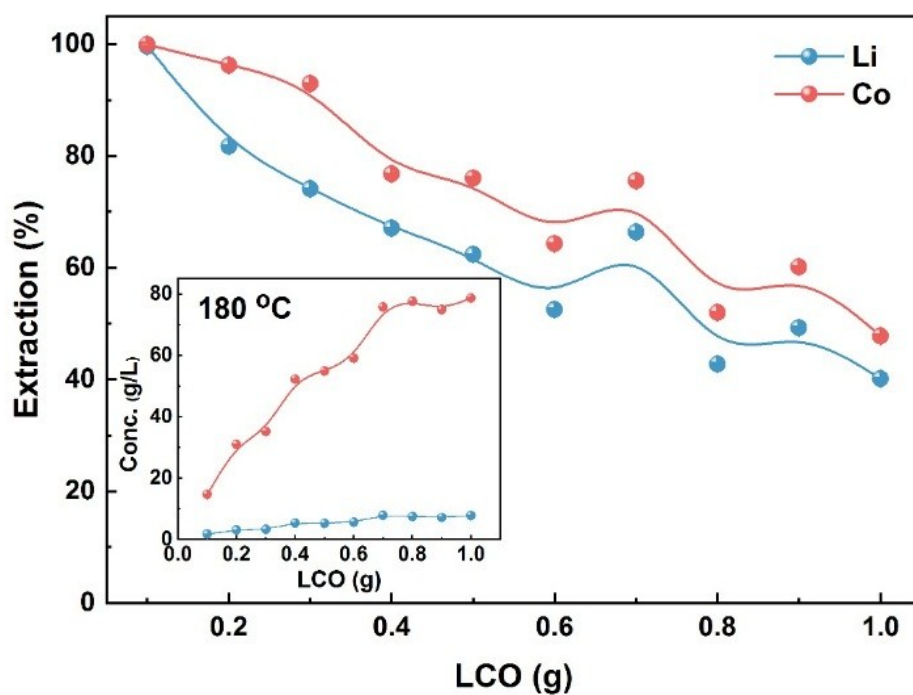

**Fig. S4** Extraction and concentration of Li and Co by using 5 g ChCl : urea DES under various mass of LCO and 180 °C.

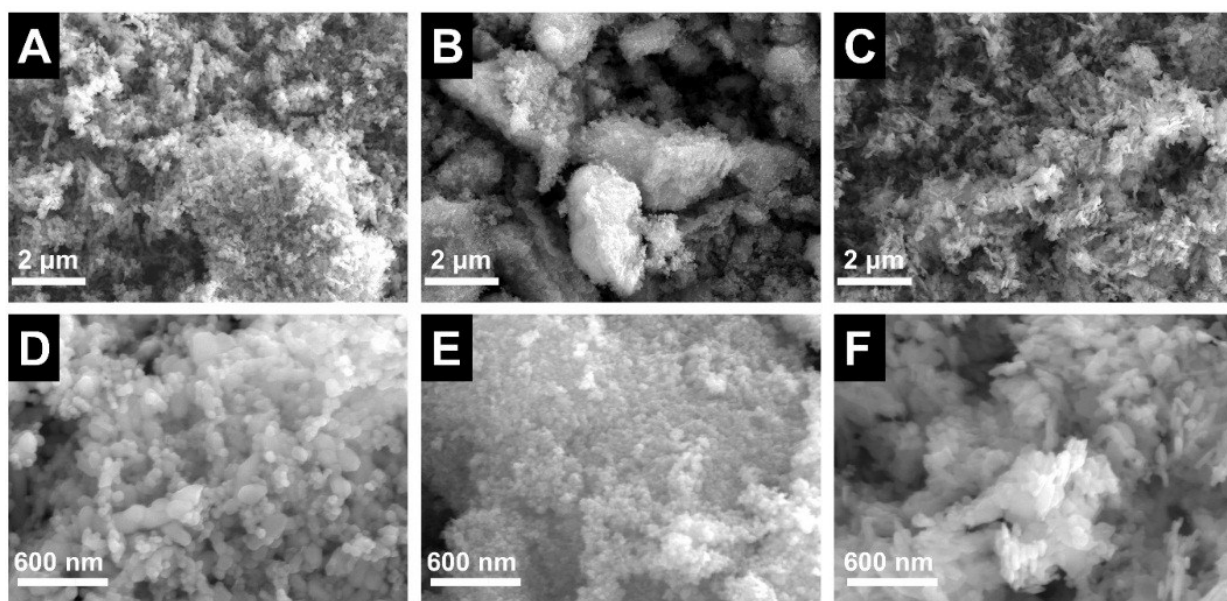

**Fig. S5** FESEM images of the calcined powder after deionized water dilution.

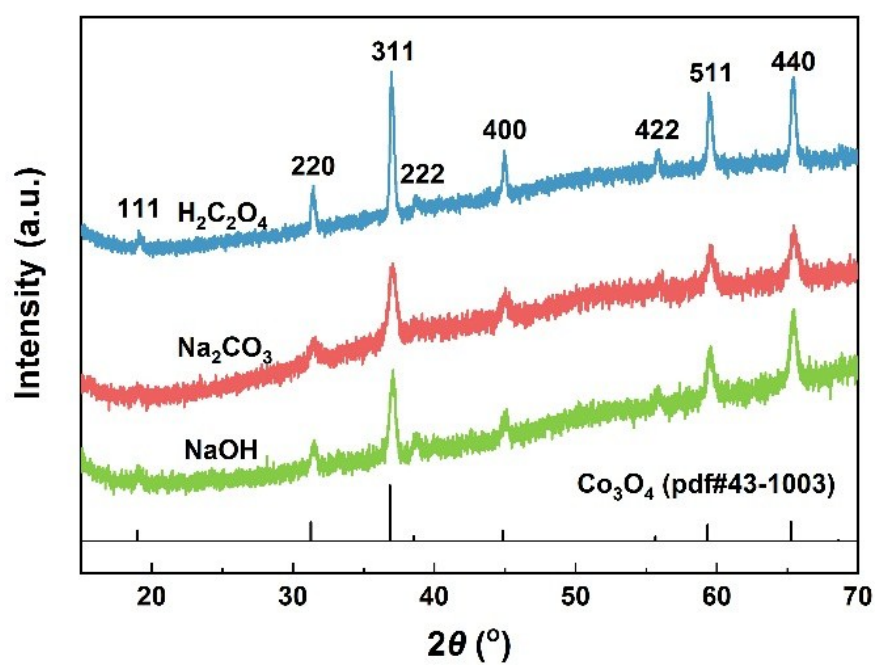

**Fig. S6** XRD spectra of the calcined powder after deionized water dilution.

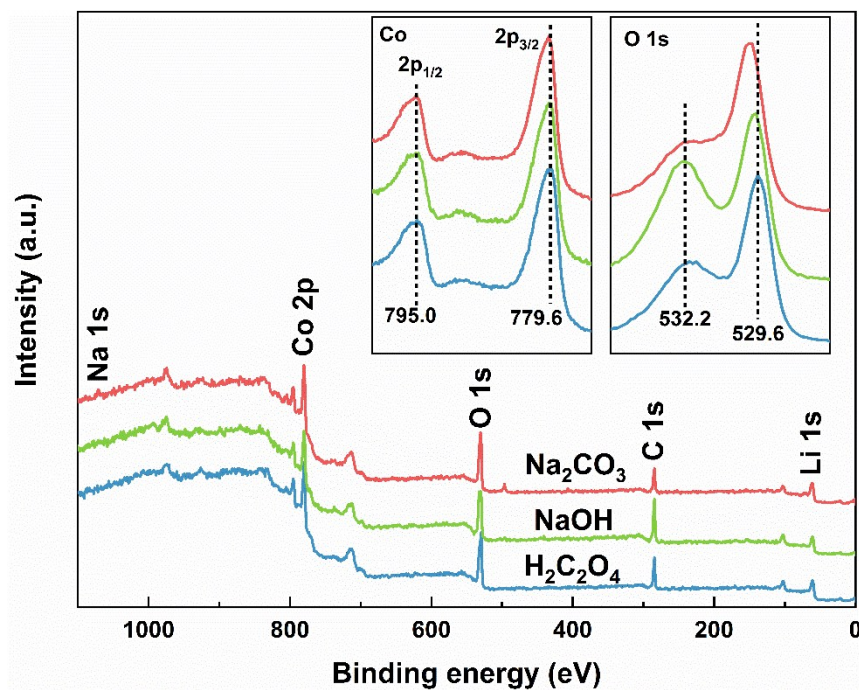

**Fig. S7** XPS spectra of the calcined powder after deionized water dilution.

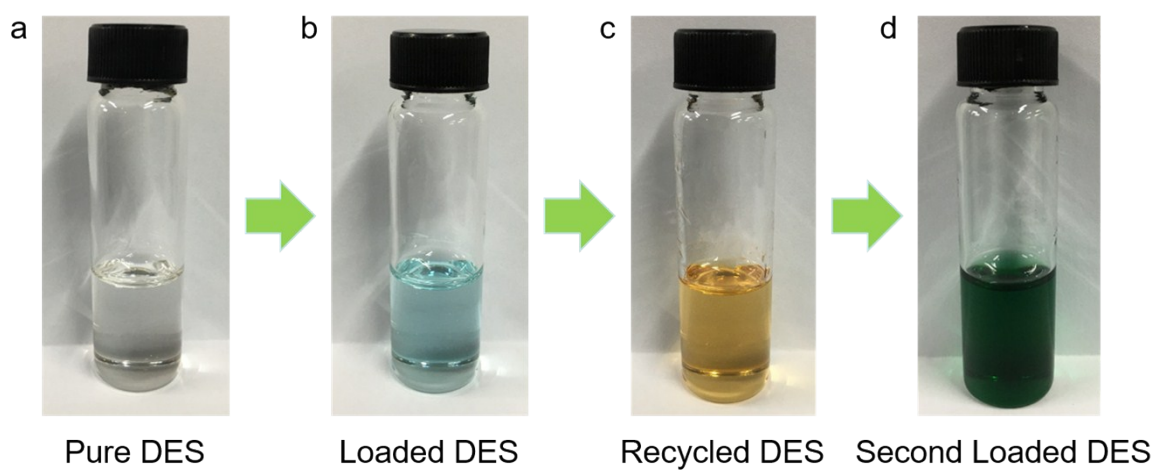

**Fig. S8** Recyclability of ChCl : urea DES.



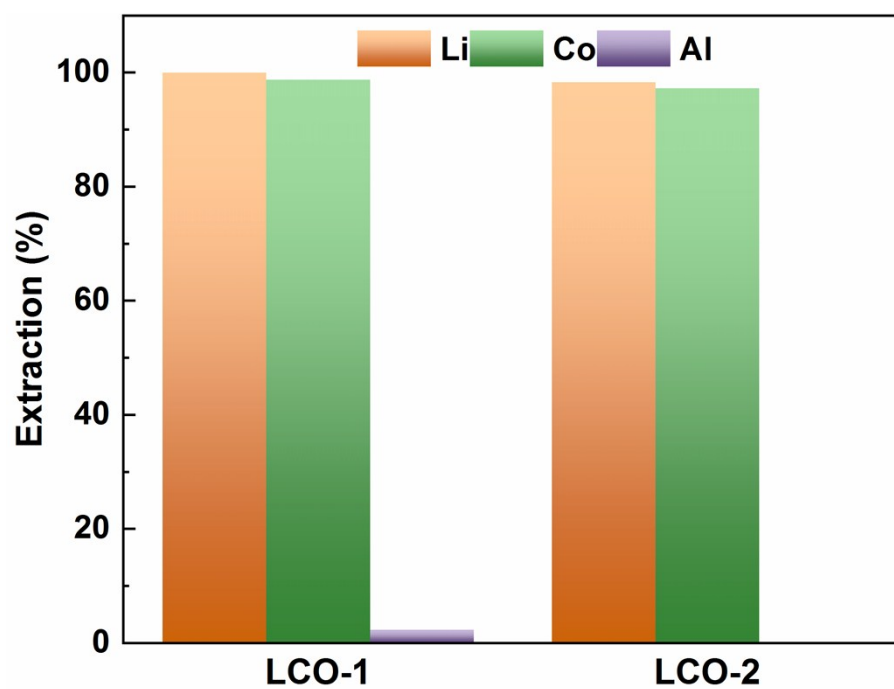

**Fig. S9** Extraction of Li, Co and Al by using ChCl : urea DES at 180 °C and 15 h

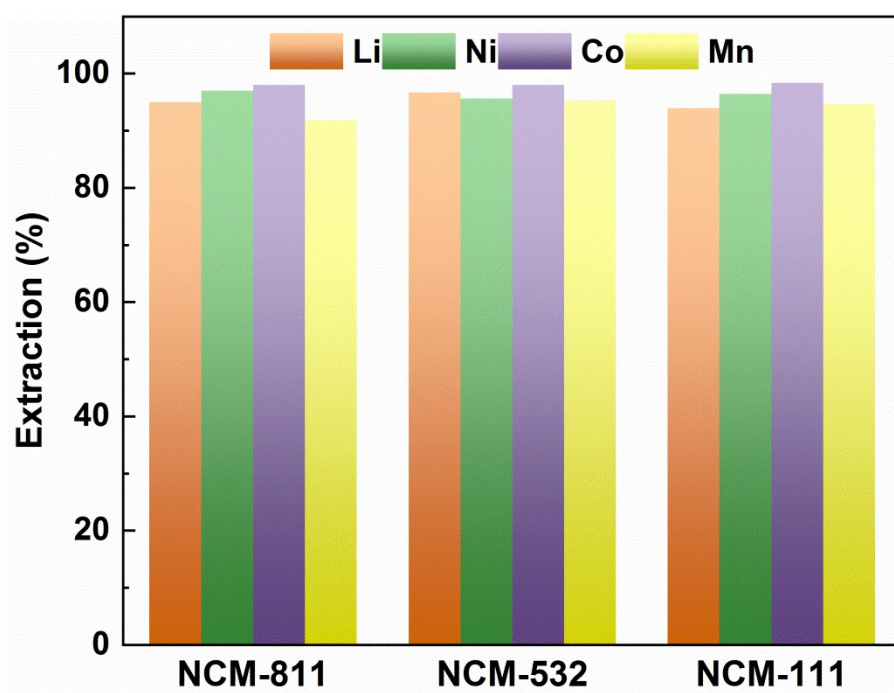

**Fig. S10** Extraction of Li, Co, Ni, and Mn by using ChCl : urea DES at 180 °C and 24 h.

**Table S1** FT-IR spectra comparison of DES in the present and absent of Co(II) cations

| Wavenumber (cm <sup>-1</sup> ) | DES 1                     | DES 2                     | Intensity     |
|--------------------------------|---------------------------|---------------------------|---------------|
| 3347                           | $\nu_{as}$ (amide N–H)    | $\nu_{as}$ (amide N–H)    | Broad, strong |
| 3205                           | $\nu_s$ (amide N–H)       | $\nu_s$ (amide N–H)       | Broad, strong |
| 2208                           | -                         |                           | Sharp, weak   |
| 2164                           | -                         |                           | Sharp, weak   |
| 1668                           | $\nu$ (amide C=O)         | $\nu$ (amide C=O)         | Sharp, strong |
| 1622                           | $\delta$ (amide N–H)      | $\delta$ (amide N–H)      | Sharp, strong |
| 1450                           | $\nu$ (amide C–N)         | $\nu$ (amide C–N)         | Sharp, medium |
| 1161                           | $\nu_{as}$ (CN)           | $\nu_{as}$ (CN)           | Weak          |
| 1085                           | $\rho$ (CH <sub>2</sub> ) | $\rho$ (CH <sub>2</sub> ) | Weak          |
| 956                            | $\nu_{as}$ (CCO)          | $\nu_{as}$ (CCO)          | Sharp, strong |

1, 2 denote DES in the absent and present of Co<sup>2+</sup>, respectively;

$\nu$  = stretching,  $\delta$  = bending,  $\rho$  = rocking, as = asymmetric, s = symmetric

## References

1. D. Y. Yue, Y. Z. Jia, Y. Yao, J. H. Sun and Y. Jing, *Electrochimica Acta*, 2012, **65**, 30-36.
2. M. K. Tran, M. T. F. Rodrigues, K. Kato, G. Babu and P. M. Ajayan, *Nature Energy*, 2019, **4**, 339-345.
